# Supplementary material for: Determinants of Dyslipidemia in Africa: A Systematic Review and Meta-Analysis
Source: Front Cardiovasc Med. 2022 Feb 23;8:778891. doi: 10.3389/fcvm.2021.778891 (PMC8904727; doi:10.3389/fcvm.2021.778891)
Supplement: Supplementary file 2 [file Data_Sheet_2.XLSX]

## Sheet: Dyslipidemia revised
Authors	Year	Country	Region	Study participant	Study design	Sample size	Frequency	LDL-oxidation in %
Adnan K et al. [23]	2020	Ethiopia	East Africa	Patients on ART	cross-sectional	353	264	31.2
Sang et al. [24]	2017	Kenya	East Africa	Type–2 DM	cross-sectional	265	208	Not reported
Ahmed et al. M[25]	2020	Ethiopia	East Africa	Patients with H. Pylori	cross-sectional	369	286	79.7
Kassahun A et al. [26]	2020	Ethiopia	East Africa	Diabetes patients	cross-sectional	248	169	28.6
Shiferaw B et al. [27]	2017	Ethiopia	East Africa	Diabetes patients	cross-sectional	224	150	43.8
Berhanu S et al. [6]	2019	Ethiopia	East Africa	hormonal contraceptives	cross-sectional	365	127	34.8
Ifeanyi C et al. [28]	2019	Nigeria	West Africa	Lichen Planus patients	cross-sectional	90	15	Not reported
Sm Y et al. [21]	2015	Nigeria	West Africa	Lichen Planus patients	cross-sectional	180	51	Not reported
Fikremariam et al. [29]	2018	Ethiopia	East Africa	Diabetes patients	cross-sectional	112	94	Not reported
Wasungu B et al. [30]	2019	Togo	West Africa	General population	cross-sectional	746	450	0.7
Alemayehu A et al. [31]	2018	Malawi	Central Africa	HIV patients	cross-sectional	554	86	Not reported
Hailu Tilahun et al. [2]	2021	Kenya	East Africa	HIV patients	cross-sectional	564	265	26.6
Fausto C et al. [32]	2021	Mozambique	Southern Africa	DM and HTN patients	cross-sectional	885	410	Not reported
Benson M et al. [22]	2021	Zambia	Central Africa	HIV patients	cross-sectional	1108	293	Not reported
Gebremedhin et al. [33]	2021	Ethiopia	East Africa	General population	cross-sectional	370	204	49.5
Doupa D et al. [34]	2014	Senegal	West Africa	General population	cross-sectional	1329	880	66.2
Asiki G et al.[35]	2015	Uganda	East Africa	General population	cross-sectional	7809	5567	5.2
Tadewos A et al.[36]	2012	Ethiopia	East Africa	HIV	comparative study	113	67	48.7
Ayoadea OG et al.[37]	2020	Nigeria	West Africa	Hypertension	cross-sectional	544	326	27.9
Dave JA et al.[38]	2016	South Africa	Southern Africa	HIV	comparative study	957	861	55.1
Jamieson L et al.[39]	2017	South Africa	Southern Africa	HIV	cohort study	10690	595	Not reported
Pitso L et al.[40]	2021	South Africa	Southern Africa	Diabetes	cross-sectional	143	120	20.9
Innes S et al.[41]	2016	South Africa	Southern Africa	HIV	longitudinal study	96	38	26
Gebreyes YF	2018	Ethiopia	East Africa	General population	National survery	9788	509	14.1
						37902	12035
